# Supplementary material
Source: publisher figshare collection journal article supplement (https://gsajournals.figshare.com/articles/dataset/_/19491587)
Supplement: Supplementary file 1 [file 1]

## Sheet: Sheet1
Genotype	Pupate	Adult		A	B	C	D	E	F	G	H	I	J	K	L	M	N	O	P	Q	R	S	T	U	V	W	X	Y
Oregon-R	0.91	0.9	A	X	ns	****	****	ns	ns	****	**	****	***	*	ns	ns	****	****	****	****	****	ns	****	****	****	****	****	****
y-w-;; +/Set820	0.87	0.83	B	ns	X	****	****	ns	ns	**	ns	ns	ns	ns	ns	ns	**	****	****	****	****	ns	****	****	****	****	****	****
y-w-;; Set820/Set820	0.66	0	C	****	****	X	****	****	****	****	****	****	****	****	****	****	****	ns	****	ns	ns	****	****	****	ns	ns	ns	ns
y-w-;; Set81/Set820	0.88	0.45	D	ns	ns	****	X	****	****	****	****	****	****	****	****	****	****	****	ns	****	****	****	**	****	****	****	****	****
y-w-;; {Set8WT},Set820/Set820	0.81	0.78	E	ns	ns	*	ns	X	**	ns	ns	ns	ns	ns	ns	ns	ns	****	****	****	****	ns	***	****	****	****	****	****
y-w-;; {Set8WT},Set820/{Set8WT},Set820	0.91	0.94	F	ns	ns	****	ns	ns	X	****	****	****	****	***	ns	**	****	****	****	****	****	**	****	****	****	****	****	****
y-w-;; {KMT5A},Set820/Set820	0.81	0.68	G	ns	ns	*	ns	ns	ns	X	ns	ns	ns	ns	****	ns	ns	****	****	****	****	*	ns	****	****	****	****	****
y-w-;; {KMT5A},Set820/{KMT5A},Set820	0.82	0.74	H	ns	ns	*	ns	ns	ns	ns	X	ns	ns	ns	ns	ns	ns	****	****	****	****	ns	*	****	****	****	****	****
y-w-;; {Set8ΔN},Set820/Set820	0.84	0.71	I	ns	ns	***	ns	ns	ns	ns	ns	X	ns	ns	**	ns	ns	****	****	****	****	ns	ns	****	****	****	****	****
y-w-;; {Set8ΔN},Set820/{Set8ΔN},Set820	0.86	0.72	J	ns	ns	***	ns	ns	ns	ns	ns	ns	X	ns	*	ns	ns	****	****	****	****	ns	ns	****	****	****	****	****
y-w-;;{KMT5A1-214::Set8555-691},Set820/Set820	0.86	0.77	K	ns	ns	****	ns	ns	ns	ns	ns	ns	ns	X	ns	ns	ns	****	****	****	****	ns	**	****	****	****	****	****
y-w-;;{KMT5A1-214::Set8555-691},Set820/{KMT5A1-214::Set8555-691},Set820	0.91	0.86	L	ns	ns	****	ns	ns	ns	ns	ns	ns	ns	ns	X	ns	****	****	****	****	****	ns	****	****	****	****	****	****
y-w-;;{Set81-554::KMT5A215-352},Set820/Set820	0.83	0.78	M	ns	ns	**	ns	ns	ns	ns	ns	ns	ns	ns	ns	X	ns	****	****	****	****	ns	***	****	****	****	****	****
y-w-;;{Set81-554::KMT5A215-352},Set820/{Set81-554::KMT5A215-352},Set820	0.86	0.67	N	ns	ns	***	ns	ns	ns	ns	ns	ns	ns	ns	ns	ns	X	****	****	****	****	*	ns	****	****	****	****	****
y-w-;; {Set8R634G},Set820/Set820	0.82	0	O	ns	ns	**	ns	ns	ns	ns	ns	ns	ns	ns	ns	ns	ns	X	****	ns	ns	****	****	****	ns	ns	ns	ns
y-w-;; {Set8R634G},Set820/{Set8R634G},Set820	0.9	0.45	P	ns	ns	****	ns	ns	ns	ns	ns	ns	ns	ns	ns	ns	ns	ns	X	****	****	****	**	****	****	****	****	****
y-w-;; {Set8R634G,H638L},Set820/Set820	0.75	0	Q	*	ns	ns	ns	ns	*	ns	ns	ns	ns	ns	*	ns	ns	ns	ns	X	ns	****	****	****	ns	ns	ns	ns
y-w-;; {Set8R634G,H638L},Set820/{Set8R634G,H638L},Set820	0.84	0	R	ns	ns	**	ns	ns	ns	ns	ns	ns	ns	ns	ns	ns	ns	ns	ns	ns	X	****	****	****	ns	ns	ns	ns
y-w-; ΔHisC; {12xHWT}	0.89	0.8	S	ns	ns	****	ns	ns	ns	ns	ns	ns	ns	ns	ns	ns	ns	ns	ns	*	ns	X	****	****	****	****	****	****
y-w-; ΔHisC; {12xHWT}, His4r15-4/15-4	0.81	0.6	T	ns	ns	*	ns	ns	ns	ns	ns	ns	ns	ns	ns	ns	ns	ns	ns	ns	ns	ns	X	****	****	****	****	****
y-w-; ΔHisC; {12xH4K20A}	0.83	0.18	U	ns	ns	***	ns	ns	ns	ns	ns	ns	ns	ns	ns	ns	ns	ns	ns	ns	ns	ns	ns	X	*	****	****	****
y-w-; ΔHisC; {12xH4K20A}, His4r15-4/S9	0.77	0.06	V	ns	ns	ns	ns	ns	ns	ns	ns	ns	ns	ns	ns	ns	ns	ns	ns	ns	ns	ns	ns	ns	X	ns	ns	ns
y-w-; ΔHisC; {12xH4K20A}, His4rK20A/15-4	0.45	0.02	W	****	****	****	****	****	****	****	****	****	****	****	****	****	****	****	****	****	****	****	****	****	****	X	ns	ns
y-w-; ΔHisC; {12xH4K20R}	0.2	0	X	****	****	****	****	****	****	****	****	****	****	****	****	****	****	****	****	****	****	****	****	****	****	****	X	ns
y-w-; ΔHisC; {12xH4K20R}, His4r15-4/15-4	0.01	0	Y	****	****	****	****	****	****	****	****	****	****	****	****	****	****	****	****	****	****	****	****	****	****	****	***	X
