# Supplementary material
Source: publisher figshare collection journal article supplement (https://gsajournals.figshare.com/articles/dataset/_/19491587)
Supplement: Supplementary file 3 [file 1]

Figure S1

|                  |                                                                   |                 |
|------------------|-------------------------------------------------------------------|-----------------|
| Set8 (Q9VFK6)    | MIMVRRRRQRPAKEAASSSSSGGASSSGSGIPVDQALPLNVAGNLLLEDQ                | 46              |
| KMT5A (Q9NQR1-2) | -----                                                             |                 |
| 47               | YFASPKRKDCRLMKVTQNGQLPEATMMAHNKDNKAGRRTIGVPLATR                   | 92              |
|                  | -----                                                             |                 |
| 93               | SQTRTIENFFKANAAAKDSQKTIHTEEQNLNLGNQELKLDDEELNGQ                   | 138             |
|                  | -----                                                             |                 |
| 139              | IKLDDEVCLKLADKQINENLPFADEVDAKAEQKLMDEELQQVVEELL                   | 184             |
|                  | -----                                                             |                 |
| 185              | FDGSSSRASSNSPFYQHDMDVMQEIQQTPEIPHIKKVTEPLEGLGSL                   | 230             |
|                  | -----                                                             |                 |
| 231              | ADFQTHRSALRDSHSSSTHSSSTDNIFLQEPVLTLDIDRTPTKASSI                   | 276             |
|                  | -----                                                             |                 |
| 277              | KINRSFELAGAVFSSPPSVLNACLNGRFNQIVSLNGQKEALDLPHF                    | 322             |
|                  | -----                                                             |                 |
| 323              | DLDQHDSSSCDSGVACGLTANTESPAGQPRRRRKPATPHRILCPSPI                   | 368             |
|                  | -----MARGRKMSKPRAVEAAAAA                                          | 22              |
|                  | * ** : . * : : . :                                                |                 |
| 369              | KTALKVTGGICKVGSADPLSPRKSPRKLPPTTTAA-----VAACKS                    | 408             |
| 23               | AAVAATAPGPPEMVERRGPGRPRTDGENVFTGQSKIYSYMSPNKCSG                   | 68              |
|                  | : . . : * * . * ** . . : : * :                                    | * . .           |
| 409              | RRRLNQPKPQAPYQPQLQKPPSQQ-QQQQQDDIVVVLDDDDDEGDD                    | 453             |
| 69               | MRF-----PLQEE--NSVTHHEVKCQGKPLAGIYRKREEKRNA                       | 104             |
|                  | * * * : : : : * . : . : : :                                       |                 |
| 454              | EDDVRALIKAAEE-----RENQNKAPATANS                                   | 479             |
| 105              | GNAVRSAMKSEEQKIKDARKGPLVPFPNQKSEAAEPPKTPPSSCDS                    | 150             |
|                  | : ** : : * : * :                                                  | * : . * : : : * |
| 480              | NKAGMKTMLKPAPVKSKTKSKGPTKGQPPLPLAATNGNREMTDFFP                    | 525             |
| 151              | TNAAIKQALKKPIKGKQAP-----RKKAQGKTQQNRKLTDFYP                       | 189             |
|                  | : * . : . * : * . * . * : * : * : : * * : *                       |                 |
| 526              | VRRSVRKTKTAVKEEWMRGLEQAVLEERC DGLQVRHFMGKGRGVVA                   | 571             |
| 190              | VRRSSRKSKAELQSEERKRIDELIESGKEEGMKIDLIDGKGRGVIA                    | 235             |
|                  | **** * : * : : . * : : : : : : : : : * * * * * :                  |                 |
| 572              | DRPFKRNEFVVEYVGDLISIGEAAEREKRYALDENAGCYMYYFKHK                    | 617             |
| 236              | TKQFSRGDFVVEYHGDLIEITDAKKREALYAQDPSTGCMYYFYLYL                    | 281             |
|                  | : * . * . : * * * * * * * * . * : * : * * * * . : * * * * * * : : |                 |
| 618              | SQQYCIDATVDTGKLGRLINHSRAGNLMTKVVLIIKQRPHLVLLAKD                   | 663             |
| 282              | SKTYCVDATRETNRLGRLINHSKCGNCQTKLHDIDGVPHLILIASR                    | 327             |
|                  | * : * * : * * : : * . : * * * * * * * : . * * * * : * : * . :     |                 |
| 664              | DIEPGEELTYDYGDRSKESLLHHPWLAF                                      | 691             |
| 328              | DIAAGEELLYDYGDRSKASIEAHPWLKH                                      | 352             |
|                  | ** * * * * * * * * * * : * * * * .                                |                 |
