# Supplementary material
Source: publisher figshare collection journal article supplement (https://gsajournals.figshare.com/articles/dataset/_/19491587)
Supplement: Supplementary file 4 [file 1]

Figure S3

KMT5A

ACCGCTGTCCAGAAAAAACGCGCCAACGCCAAAAAAAACCCAAGTAACTACCGCCACACAGCGATCACGCG  
CCCCCAACCCATTTTAAATGGCTCGCGGCAGAAAGATGTCAAAGCCCCGCGCGGTTCGAGGCGGCGGCGGCGGCGG  
GCGGCGGTGGCAGCCACGGCCCCGGGCCCCGAGATGGTGGAGCGCCGGGGCCCTGGACGGCCCCGACCGACGG  
AGAGAACGTGTTTACAGGACAGTCTGAAGATCTATTCCTATATGTCGCCAAATAAATGCAGCGGAATGCGTTTCC  
CCCTACAGGAAGAGAACTCAGTAACACACCACGAAGTCAAGTGCCAGGGAAAACCACTGGCCGGAATCTACCGG  
AAGCGAGAAGAGAAGCGCAATGCTGGAAACGCAGTTCGATCTGCCATGAAGTCCGAGGAGCAGAAGATCAAAGA  
TGCCAGAAAGGGTCCCCTGGTACCTTTCCCAAACCAAAAAAGCGAGGCAGCAGAACCGCCAAAAACTCCACCAA  
GCAGCTGTGATAGCACTAATGCAGCCATCGCCAAGCAAGCCCTAAAAAAGCCCATCAAAGGCAAGCAGGCCCCG  
CGTAAAAAGGCTCAAGGAAAAACCAACAGAATCGTAAACTTACGGACTTCTACCGGTGCGAAGGAGTTCCCCG  
CAAGTCTAAGGCCGAGCTGCAGAGCGAAGAACGGAAACGCATAGATGAATTGATTGAGAGTGGAAGGAAGAAG  
GTATGAAGATTGATTTGATCGATGGCAAGGGAAGAGGCGTAATTGCCACAAAGCAGTTTTCTCGCGGTGACTTT  
GTGGTTGAGTATCACGGAGATCTCATAGAGATAACTGACGCCAAGAAACGGGAGGCTCTGTATGCGCAGGACCC  
GTCCACGGGGTGCTATATGTACTACTTCCAGTATCTGTCCAAAACATACTGCGTGGATGCAACCCGCGAGACCA  
ATCGCCTGGGGCGCCTCATCAATCACTCGAAATGTGGTAACTGCCAAACCAAACTGCACGACATCGACGGCGTA  
CCGCATCTCATACTCATCGCCTCCCAGACATCGCGGCTGGCGAGGAACTGCTGTATGACTACGGGGACCGATC  
GAAGGCTTCAATTGAAGCCCATCCTTGGTTGAAGCATTGAGGAAGAGCTCTCCAGGAGCTCGCGAAAGGGGTTG  
CGGTACAGCCTTAAAACGAAGACTATTTACCATGTTTCAGGGCAGAGAATCTTTAAAATAATAAGACCTGGGCTA  
AACTGGTTTTTGGCTCGAGGGAATCTTTCTTAGCTTTTATACGTAGATTGCCTTGCCTTGAACCACTGCAAAAT  
TGTTTTTCAGACCTGTTTCCGTGTGATAAGTTGCCGGAATTTGATTCAATTACAAAGTTTCATTAAGCAAAATTA  
TATCAATATTGCAAGCACTTATATTTTTGGTAAGACCAATTCAATCATTACGAATTCCGGCAATTTGGATCGGA  
ATGGAGAGAGGCGTATTTGACACCGCT

MARGRKMSKPRAVEAAAAAAVAATAPGPENVERRGPRPRTDGENVFTGQSKIYSYMSPNKC SGMRFP LQEEN  
SVTHHEVKCQ GKPLAGIYRKREEKRNAGNAVRSAMKSEEQKIKDARKGPLVPFPNQKSEAAEPPKTPPSSCDST  
NAAIAKQALKKPIK GKQAPRKKAQGKTQQNRKLTDYFPVRRSSRKSKAELQSEERKRIDELIESGKEEGMKIDL  
IDGKGRGVIATKQFSRGDFVVEYHGDLEITDAKKREALYAQDPSTGCYMYFYQYLSKTYCVDATRETNRLGRL  
INH SKCGNCQTKLHDIDGVPHLILIASRDIAAGEELLYDYGDRSKASIEAHPWLKH\*

Figure S3

Set8<sup>ΔN</sup>

ACCGCTGTCCAGAAAAAACGCGCCAACGCCAAAAAAAACCCAAGTAACTACCGCCACACAGCGATCACGCG  
CCCCCAACCCATTTTAAATGACTGCCAATACAGAATCGCCAGCGGGGCAACCCCGACGCAGAAAAACCAGCCACA  
CCGCATCGCATCCTCTGCCCTCGCCAATCAAAACGGCTTTGAAGGTAAC TGGAGGGATTTGCAAGGTCGGATC  
TGCGGATCCATTGTGCGCGCGCAAGTCTCCTCGAAAAC TCCGACCACAACAGCAGCGGTGGCAGCCTGCAAGT  
CGCGTGAAGACTGAACCAGCCAAAGCCACAAGCGCCTTACCAGCCACAGCTACAGAAACCACCGTCACAACAG  
CAGCAGCAGCAGCAGGATGATATCGTCGTGGTGCTAGACGACGACGATGATGAAGGAGATGACGAGGACGACGT  
TCGAGCCCTGATCAAGGCTGCCGAGGAGCGTGAAAACCAGAACAAAGCACCAGCCACAGCGAACAGCAACAAAG  
CAGGCATGAAAACGATGCTCAAGCCTGCGCCCGTGAAATCAAAGACCAAAAAGCAAGGGGGCCAACGAAGGGACAA  
CCGCCGCTGCCCTTGGCTGCCACCAACGGCAATCGTGAGATGACGGACTTCTTCCCGGTGCGAAGGAGTGTGCG  
CAAGACTAAGACGGCCGTCAAGGAGGAATGGATGCGAGGCTTGGAGCAAGCAGTGCTGGAAGAGCGCTGCGATG  
GTCTCCAAGTACGCCACTTTATGGGCAAGGGAAGAGGCGTAGTCGCCGATCGGCCCTTTAAACGCAACGAATTT  
GTGGTTGAGTATGTGGGAGATCTCATATCTATAGGCGAAGCCGCGGAACGGGAGAAACGCTATGCGTTGGACGA  
GAATGCTGGGTGCTATATGTACTACTTCAAGCACAAGTCCCAGCAGTACTGCATCGATGCAACCGTTGACACCG  
GCAAGCTGGGGCGCCTCATCAATCACTCGCGGGCTGGTAACCTAATGACCAAAGTAGTACTTATCAAACAGCGG  
CCGCATCTCGTACTCCTGGCCAAGGACGACATCGAGCCGGGCGAGGAACTGACCTATGACTACGGGGACCGATC  
GAAGGAGTCACTATTGCACCATCCTTGGTTGGCCTTCTGAGGAAGAGCTCTCCAGGAGCTCGCGAAAGGGGTTG  
CGGTACAGCCTTAAAACGAAGACTATTTACCATGTT CAGGGCAGAGAATCTTTAAAATAATAAGACCTGGGCTA  
AACTGGTTTTTGGCTCGAGGGAATCTTTCTTAGCTTTTATACGTAGATTGCCTTGCCTTGAACCACTGCAAAAT  
TGTTTTTCAGACCTGTTTCCGTGTGATAAGTTGCCGGAATTTGATTCAATTTACAAAGTTTCATTAAGCAAAATTA  
TATCAATATTGCAAGCACTTATATTTTTTGGTAAGACCAATTCAATCATTACGAATTCCGGCAATTTGGATCGGA  
ATGGAGAGAGGCGTATTTGACACCGCT

MTANTESPAGQPRRRKPATPHRILCPSPIKTALKVTGGICKVGSADPLSPRKSPRKLPPTTTAAVAACKSRRRLN  
QPKPQAPYQPQLQKPPSQQQQQQDDIVVVLDDDDDEGDDEDDVRALIKAAEERENQNKAPATANSNKAGMKT  
LKPAPVKSSTKSKGPTKGPPPLAATNGNREMTDFFPVRRSVRKTKTAVKEEWMRGLEQAVLEERC DGLQVRH  
FMGKGRGVVADRPFKRNEFVVEYVGDLISIGEAAEREKRYALDENAGCYMYFHKHSQQYC I DATVDTGKLGR  
LNHRSRAGNLMTKVVLIKQRPHLVLLAKDDIEPGEELTYDYGDRSKESLLHHPWLAF\*

Figure S3

N-KMT5A::Set8-C

ACCGCTGTCCAGAAAAAACGCGCCAACGCCAAAAAAAACCCAAGTAACTACCGCCACACAGCGATCACGCG  
CCCCCAACCCATTTTAAATGGCTCGCGGCAGAAAGATGTCAAAGCCCCGCGCGGTTCGAGGCGGCGGCGGCGGCG  
GCGGCGGTGGCAGCCACGGCCCCGGGCCCCGAGATGGTGGAGCGCCGGGGCCCTGGACGGCCCCGACCGACGG  
AGAGAACGTGTTACAGGACAGTCGAAGATCTATTCCTATATGTGCCAAATAAATGCAGCGGAATGCGTTTCC  
CCCTACAGGAAGAGAACTCAGTAACACACCACGAAGTCAAGTGCCAGGGAAAACCACTGGCCGGAATCTACCGG  
AAGCGAGAAGAGAAGCGCAATGCTGGAAACGCAGTTCGATCTGCCATGAAGTCCGAGGAGCAGAAGATCAAAGA  
TGCCAGAAAGGGTCCCCTGGTACCTTTCCCAAACCAAAAAAGCGAGGCAGCAGAACCGCCAAAAACTCCACCAA  
GCAGCTGTGATAGCACTAATGCAGCCATCGCCAAGCAAGCCCTAAAAAAGCCCATCAAAGGCAAGCAGGCCCGG  
CGTAAAAAGGCTCAAGGAAAAACCAACAGAATCGTAAACTTACGGACTTCTACCGGTGCGAAGGAGTTCCCG  
CAAGTCTAAGGCCGAGCTGCAGAGCGAAGAACGGAAACGCATAGATGAATTGATTGAGAGTGGAAGGAAGATG  
GTCTCCAAGTACGCCACTTTATGGGCAAGGGAAGAGGCGTAGTCGCCGATCGGCCCTTTAAACGCAACGAATTT  
GTGGTTGAGTATGTGGGAGATCTCATATCTATAGGCGAAGCCGCGGAACGGGAGAAACGCTATGCGTTGGACGA  
GAATGCTGGGTGCTATATGTACTACTTCAAGCACAAAGTCCCAGCAGTACTGCATCGATGCAACCGTTGACACCG  
GCAAGCTGGGGCGCCTCATCAATCACTCGCGGGCTGGTAACCTAATGACCAAAGTAGTACTTATCAAACAGCGG  
CCGCATCTCGTACTCCTGGCCAAGGACGACATCGAGCCGGGCGAGGAACTGACCTATGACTACGGGGACCGATC  
GAAGGAGTCACTATTGCACCATCCTTGGTTGGCCTTCTGAGGAAGAGCTCTCCAGGAGCTCGCGAAAGGGGTTG  
CGGTACAGCCTTAAAACGAAGACTATTTACCATGTTTCAGGGCAGAGAATCTTTAAAATAATAAGACCTGGGCTA  
AACTGGTTTTTGGCTCGAGGGAATCTTTCTTAGCTTTTATACGTAGATTGCCTTGCCTTGAACCACTGCAAAAT  
TGTTTTTCAGACCTGTTTCCGTGTGATAAGTTGCCGGAATTTGATTCAATTTACAAAGTTTCATTAAGCAAAATTA  
TATCAATATTGCAAGCACTTATATTTTTGGTAAGACCAATTCAATCATTACGAATTCCGGCAATTTGGATCGGA  
ATGGAGAGAGGCGTATTTGACACCGCT

MARGRKMSKPRAVEAAAAAAVAATAPGPMEVERRGPGRPRTDGENVFTGQSKIYSYMSPNKCSGMRFPQLQEN  
SVTHHEVKCQGKPLAGIYRKREEKRNAGNAVRSAMKSEEQKIKDARKGPLVPFPNQKSEAAEPPKTPPSSCDST  
NAAIAKQALKKPIKQKQAPRKKAQGKTQQNRKLTDYFVRRSSRKSKAELQSEERKRIDELIESGKEDGLQVRH  
FMGKGRGVVADRPFRNEFVVEYVGDLSIGEAAREKRYALDENAGCYMYFKHKSQQYCIDATVDTGKLGRL  
INHSRAGNLMTKVVLIKQRPHLVLLAKDDIEPGEELTYDYGDRSKESLLHHPWLAF\*

Figure S3

N-Set8::KMT5A-C

AGCCCTGTCCAGAAAAAACGCGCCAACGCCAAAAAAAACCCAAGTAACTACCGCCACACAGCGATCACGCG  
CCCCCAACCCATTTTAAATGATAATGGTGCGAAGACGACAACGGCCCGCCAAGGAAGCCGCATCCTCATCCTCT  
GGTGGAGCTTCCTCGGGATCGGAATTCTGTGTGACCAGGCACTGCCACTGAATGTGGCGGGAAATCTGCTGGA  
GGATCAGTATTTTGCCAGCCCCAAGCGGAAAGACTGCCGTTTGATGAAGGTCACCTCAAATGGCCAACTGCCGG  
AAGCCACAATGATGGCACACAACAAAGACAACAAAGCGGGTCGCACAATAGGTGAGTACGCTTCTCGTACTTTT  
TAGGTTAGCTGTGTTGGCTAAAATACCCCTTGTTTGTATTATTTTCAAGGAGTTCCCTTGCCACGCGCTCACA  
ACTCGCACCATTGAGAACTTCTTCAAAGCCAATGCTGCCGCTAAGGATTCCCAAAGACAATACACACAGAGGA  
GCAGTTGAATCTAGGAAATCAGGAACTGAAACTGGACGATGAGGAGCTAAATGGACAGATAAAACTAGATGACG  
AGGTGCTAAAGCTGGCAGACAAGCAGATAAATGAAAACCTTCCCTTTGCCGACGAAGTAGATGCCAAGGCAGAA  
CAAAAGCTTATGGATGAGGAACTGCAGCAGGTGGTGGAGGAACCTCTGTTTCGATGGCAGTTCCAGAGCGTCCTC  
CAATTGCGCCCTTTTATCAGCATGATATGGATGTCATGCAGGAGATCCAGCAGACTCCAGAAATTCCACACATCA  
AAAAGGTCACAGAGCCGCTCGAGGGACTGGGCTCTCTGGCCGACTTCCAGACACATCGCTCTGCGCTGAGGGAC  
AGCCACAGTTCCACGCACAGCAGCAGCACCAGACAACATCTTCTGCAGGAGCCGGTACTGACCCTGGACATTGA  
TCGCACGCCCACCAAAGCCTCCAGCATAAAGATCAATCGGAGCTTCGAACTGGCCGGAGCCGTATTCTCATCAC  
CTCCGTCGGTGCTAAACGCCTGTCTCAATGGACGCTTCAATCAAATAGTAAGCCTGAATGGACAAAAGGAGGCG  
CTGGACTTGCCGCACTTCGATTTGGATCAACATGACAGTAGTTCTTGCGACAGCGGAGTAGCCTGTGGTCTCAC  
TGCCAATACAGAATCGCCAGCGGGGCAACCCCGACGCAGAAAACCAGCCACACCGCATCGCATCCTCTGCCCT  
CGCCAATCAAAACGGCTTTGAAGGTAAGTGGAGGGATTTGCAAGGTCGGATCTGCGGATCCATTGTGCGCGCGC  
AAGTCTCCTCGAAAACCTGCCGACCACAACAGCAGCGGTGGCAGCCTGCAAGTCGCGTCGAAGACTGAACCAGCC  
AAAGCCACAAGCGCCTTACCAGCCACAGCTACAGAAACCACCGTCACAACAGCAGCAGCAGCAGCAGGATGATA  
TCGTCGTGGTGCTAGACGACGACGATGATGAAGGAGATGACGAGGACGACGTTTCGAGCCCTGATCAAGGCTGCC  
GAGGAGCGTGAAAACCAGAACAAAGCACCAGCCACAGCGAACAGCAACAAAGCAGGCATGAAAACGATGCTCAA  
GCCTGCGCCCGTGAAATCAAAGACCAAAAAGCAAGGGGCCAACGAAGGGACAACCGCCGCTGCCCTTGGCTGCCA  
CCAACGGCAATCGTGAGATGACGGACTTCTTCCCGGTGCGAAGGAGTGTGCGCAAGACTAAGACGGCCGTCAAG  
GAGGAATGGATGCGAGGCTTGGAGCAAGCAGTGCTGGAAGAGCGCTGCGAAGGTATGAAGATTGATTTGATCGA  
TGGCAAGGGAAGAGGCGTAATTGCCACAAAGCAGTTTCTCGCGGTGACTTTGTGGTTGAGTATCACGGAGATC  
TCATAGAGATAACTGACGCCAAGAAACGGGAGGCTCTGTATGCGCAGGACCCGTCCACGGGGTGCTATATGTAC  
TACTTCCAGTATCTGTCCAAAACATACTGCGTGGATGCAACCCGCGAGACCAATCGCCTGGGGCGCCTCATCAA  
TCACTCGAAATGTGGTAACTGCCAAACCAAACCTGCACGACATCGACGGCGTACCGCATCTCATACTCATCGCCT  
CCCGAGACATCGCGGCTGGCGAGGAACTGCTGTATGACTACGGGGACCGATCGAAGGCTTCAATTGAAGCCCAT  
CCTTGGTTGAAGCATTGAGGAAGAGCTCTCCAGGAGCTCGCGAAAGGGGTTGCGGTACAGCCTTAAAACGAAGA  
CTATTTACCATGTTTACGGGCAGAGAATCTTTAAAATAATAAGACCTGGGCTAAACTGGTTTTTGGCTCGAGGGA  
ATCTTTCTTAGCTTTTATACGTAGATTGCCTTGCCTTGAACCACTGCAAAATTGTTTTTACAGACCTGTTTCCGTG  
TGATAAGTTGCCGGAATTTGATTCATTTACAAAGTTTCATTAAGCAAAATTATATCAATATTGCAAGCACTTAT  
ATTTTTGGTAAGACCAATTCAATCATTACGAATTCGCGCAATTTGGATCGGAATGGAGAGAGGCGTATTTGAC  
GCGCT

MIMVRRRQRPakeaASSSSGASSSGSIPVDQALPLNVAGNLLEDQYFASPKRKDCRLMKVTQNGQLPEATMMA  
HNKDNKAGRTIGVPLATRSQTRTIENFFKANAAKDSQKTIHTEEQLNLGNQELKLDDEELNGQIKLDDEVVLK  
ADKQINENLPFADEVDAKAEQKLMDEELQQVVEELLFDGSSRASSNSPFYQHMDVMQEIQQTPPEIPHIKKVTE  
PLEGLGLSLADFQTHRSALRDSHSSSTHSSSTDNI FLQEPVLTLDIDRTPTKASSIKINRSFELAGAVFSSPPSVL  
NACLNGRFNQIVSLNGQKEALDLPHFDLDQHDSSSCDSGVACGLTANTESPAGQPRRRKPATPHRILCPSPIKT  
ALKVTGGICKVGSADPLSPRKS PRKLPTTTAAVAACKSRRRLNQPKQAPYQPQLQKPPSQQQQQQDDIVVVL  
DDDDDEGDDDDVRLIKAAEERENQNKAPATANSNKAGMKTMLKPAPVKSKTKSKGPTKGQPPLPLAATNGNR  
EMTDFFPVRRSVRKTKTAVKEEWMRGLEQAVLEERCEGMKIDLIDGKGRGVIATKQFSRGDFVVEYHGDLEIT  
DAKKREALYAQDPSTGCYMYFQYLSKTYCVDATRETNRLGRLINHSKCGNCQTKLHDIDGVPHLILIASRDIA  
AGEELLYDYGDRSKASIEAHPWLKH\*
