# Supplementary material
Source: publisher figshare collection journal article supplement (https://gsajournals.figshare.com/articles/dataset/_/19491587)

Figure S4

WT rep 1 500 ns

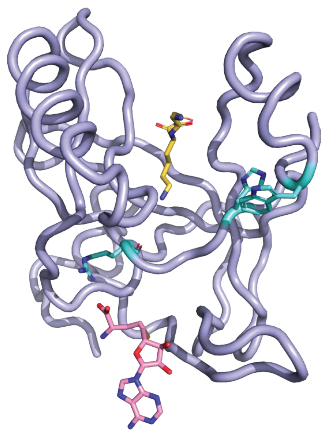

RG rep 1 500 ns

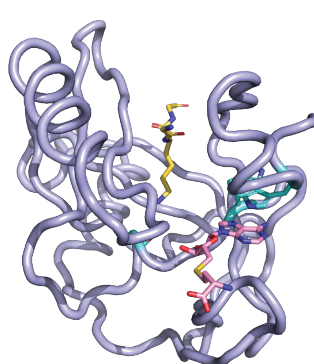

RGHL rep 1 500 ns

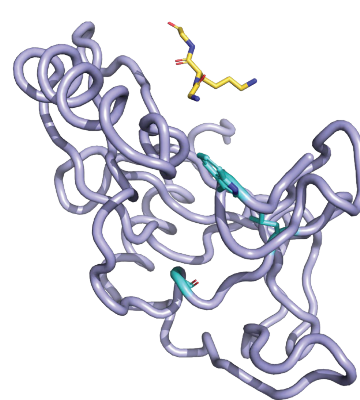

WT rep 2 500 ns

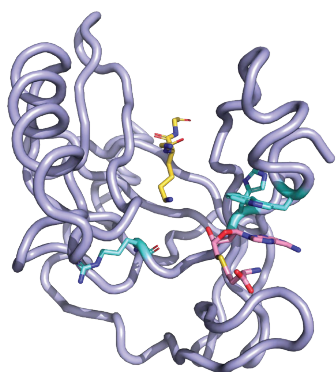

RG rep 2 500 ns

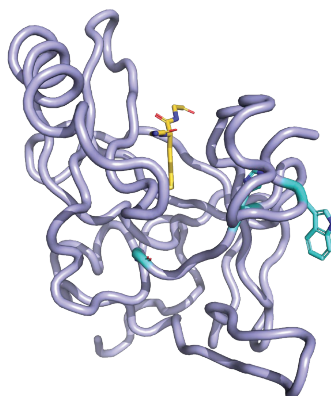

RGHL rep 2 500 ns

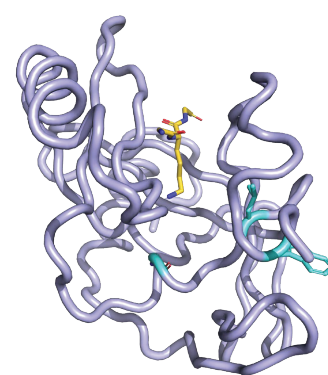

WT rep 3 500 ns

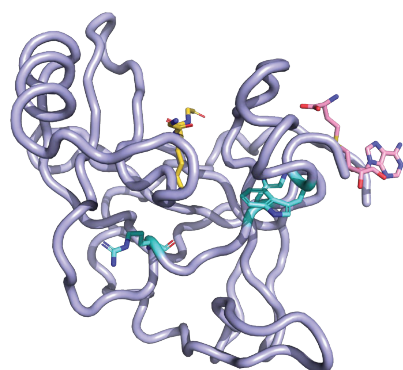

RG rep 3 500 ns

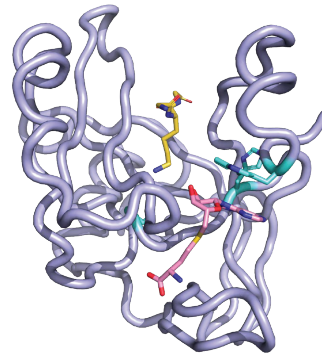

RGHL rep 3 500 ns

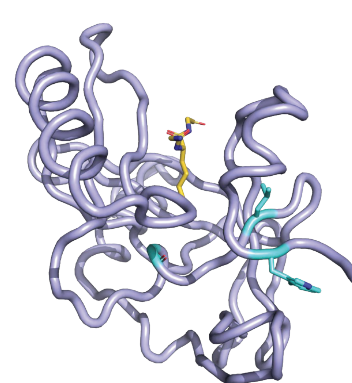

WT rep 4 500 ns

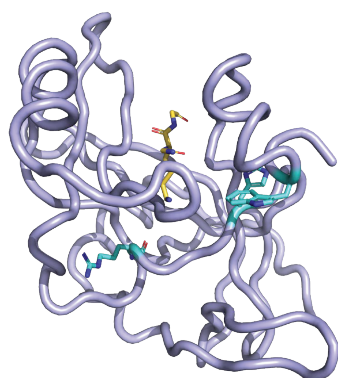

RG rep 4 500 ns

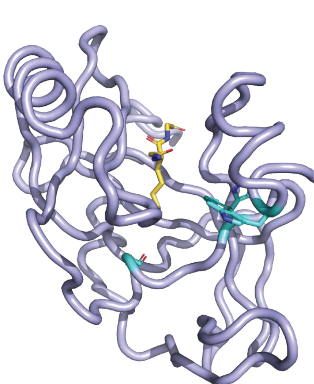

RGHL rep 4 500 ns

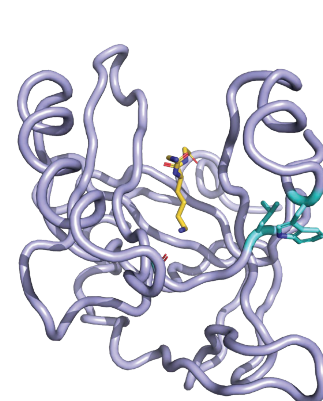

Supplement: Supplementary file 7 [file 1]
