# Supplementary material
Source: publisher figshare collection journal article supplement (https://gsajournals.figshare.com/articles/dataset/_/19491587)

Figure S2

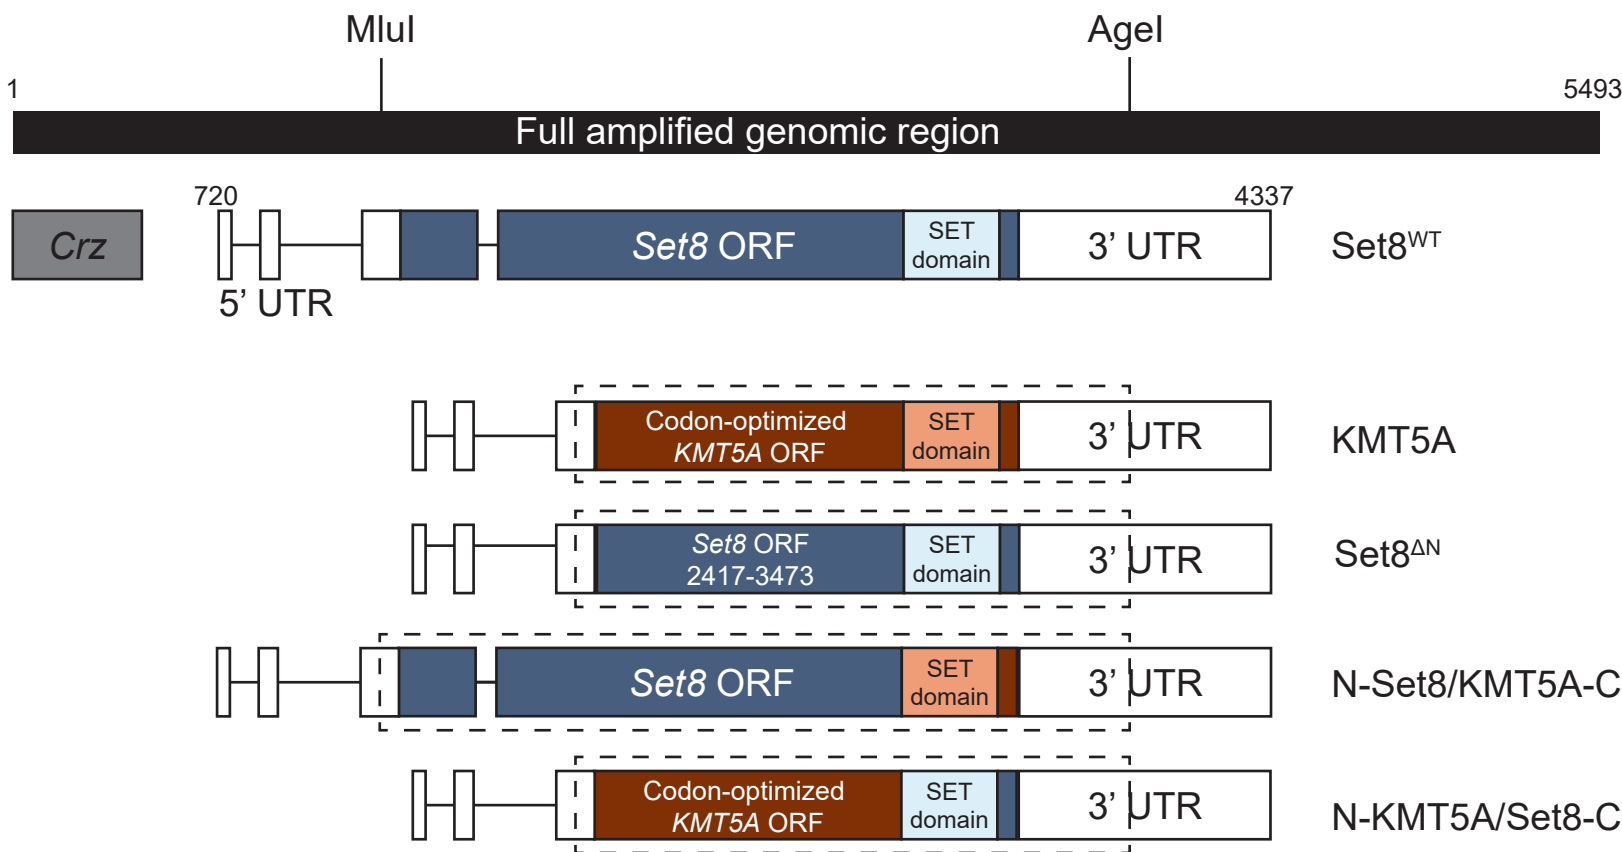

Supplement: Supplementary file 1 [file 1]

Figure S7

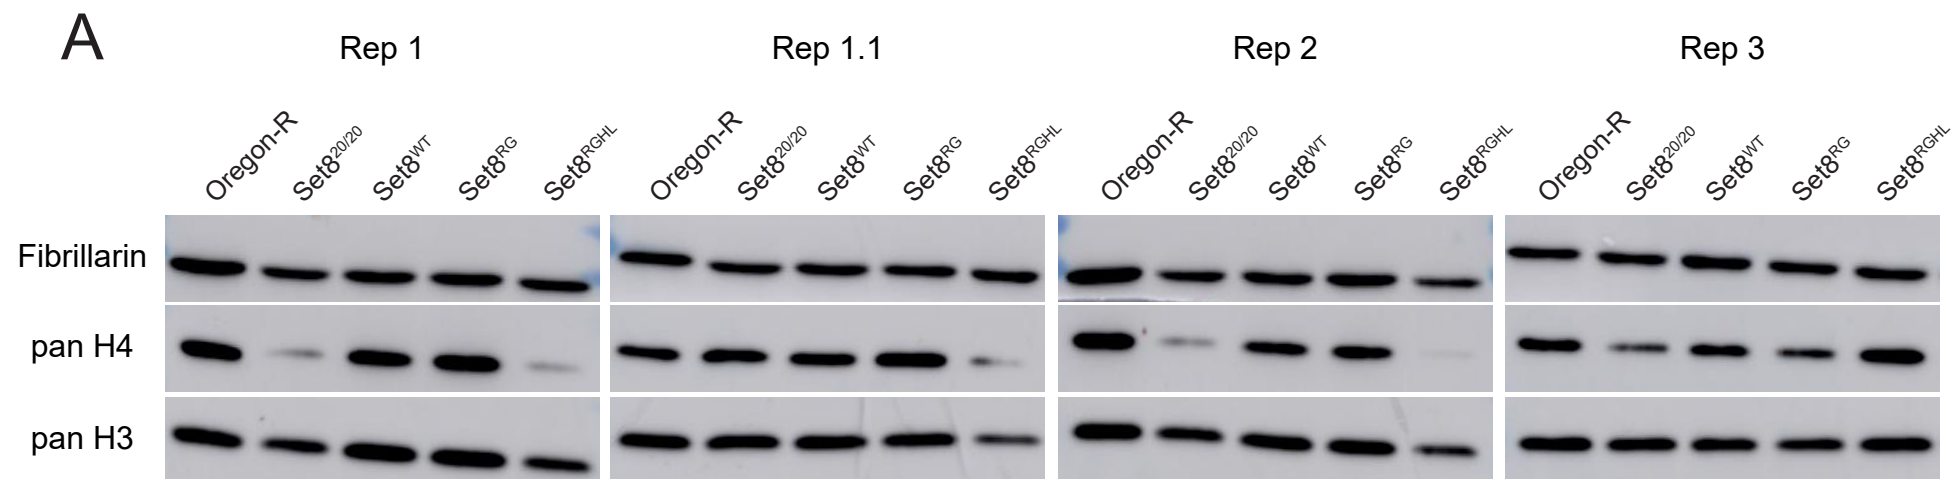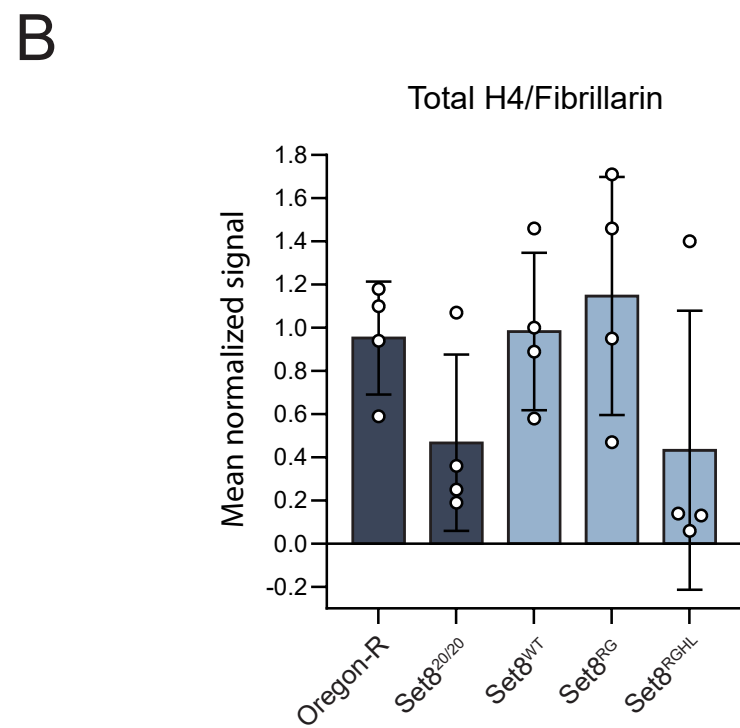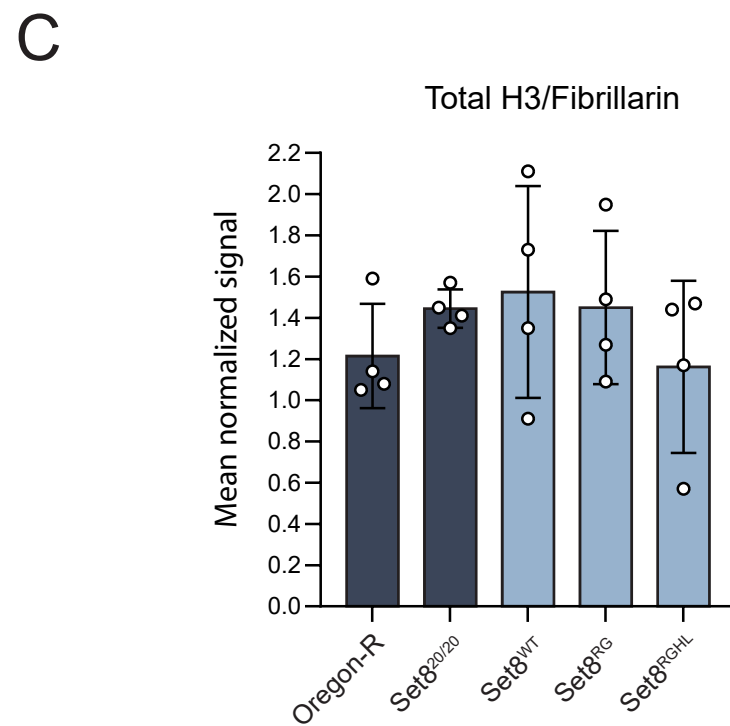

Supplement: Supplementary file 2 [file 1]

Figure S5

Rep 1.1

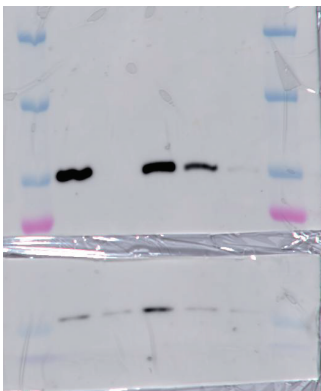

Rep 1.2

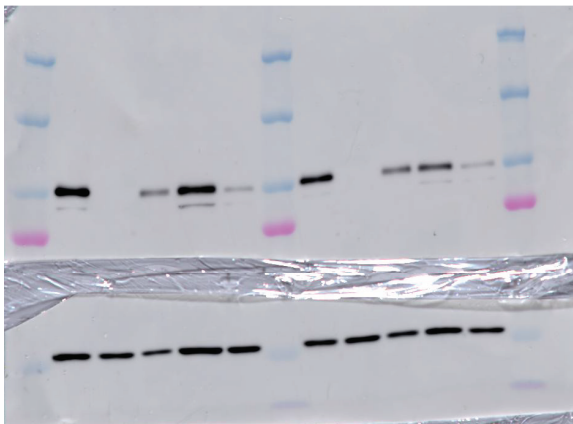

Rep 1.3

Rep 1.4

Rep 2.1

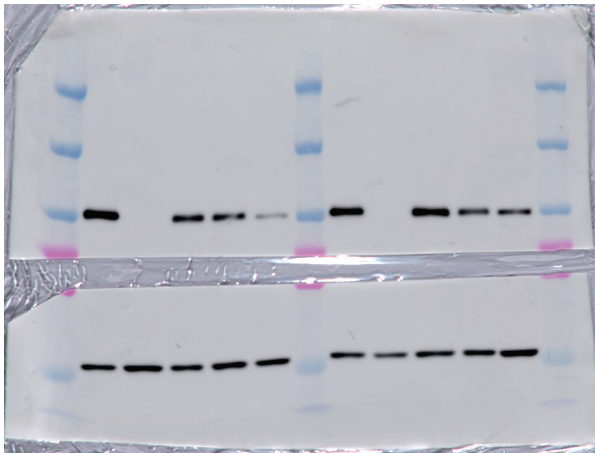

Rep 2.2

Rep 3.1

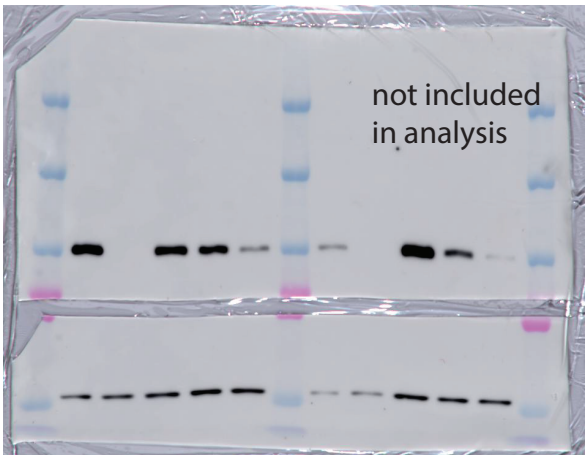

Rep 2.3

Rep 3.2

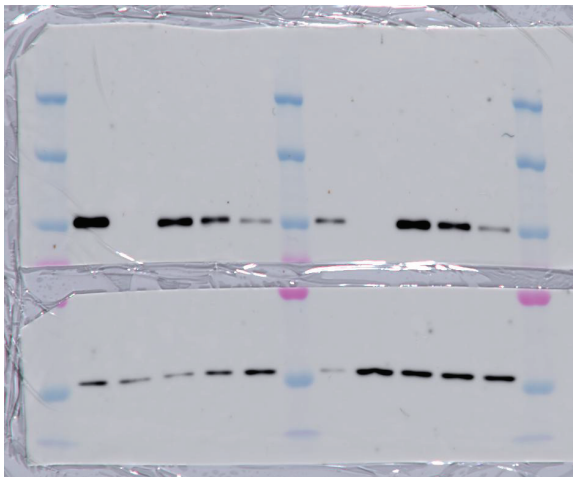

Rep 4.1

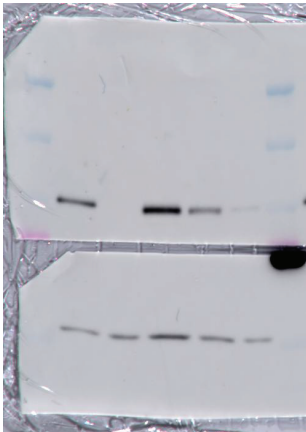

Supplement: Supplementary file 5 [file 1]

Figure S6

A

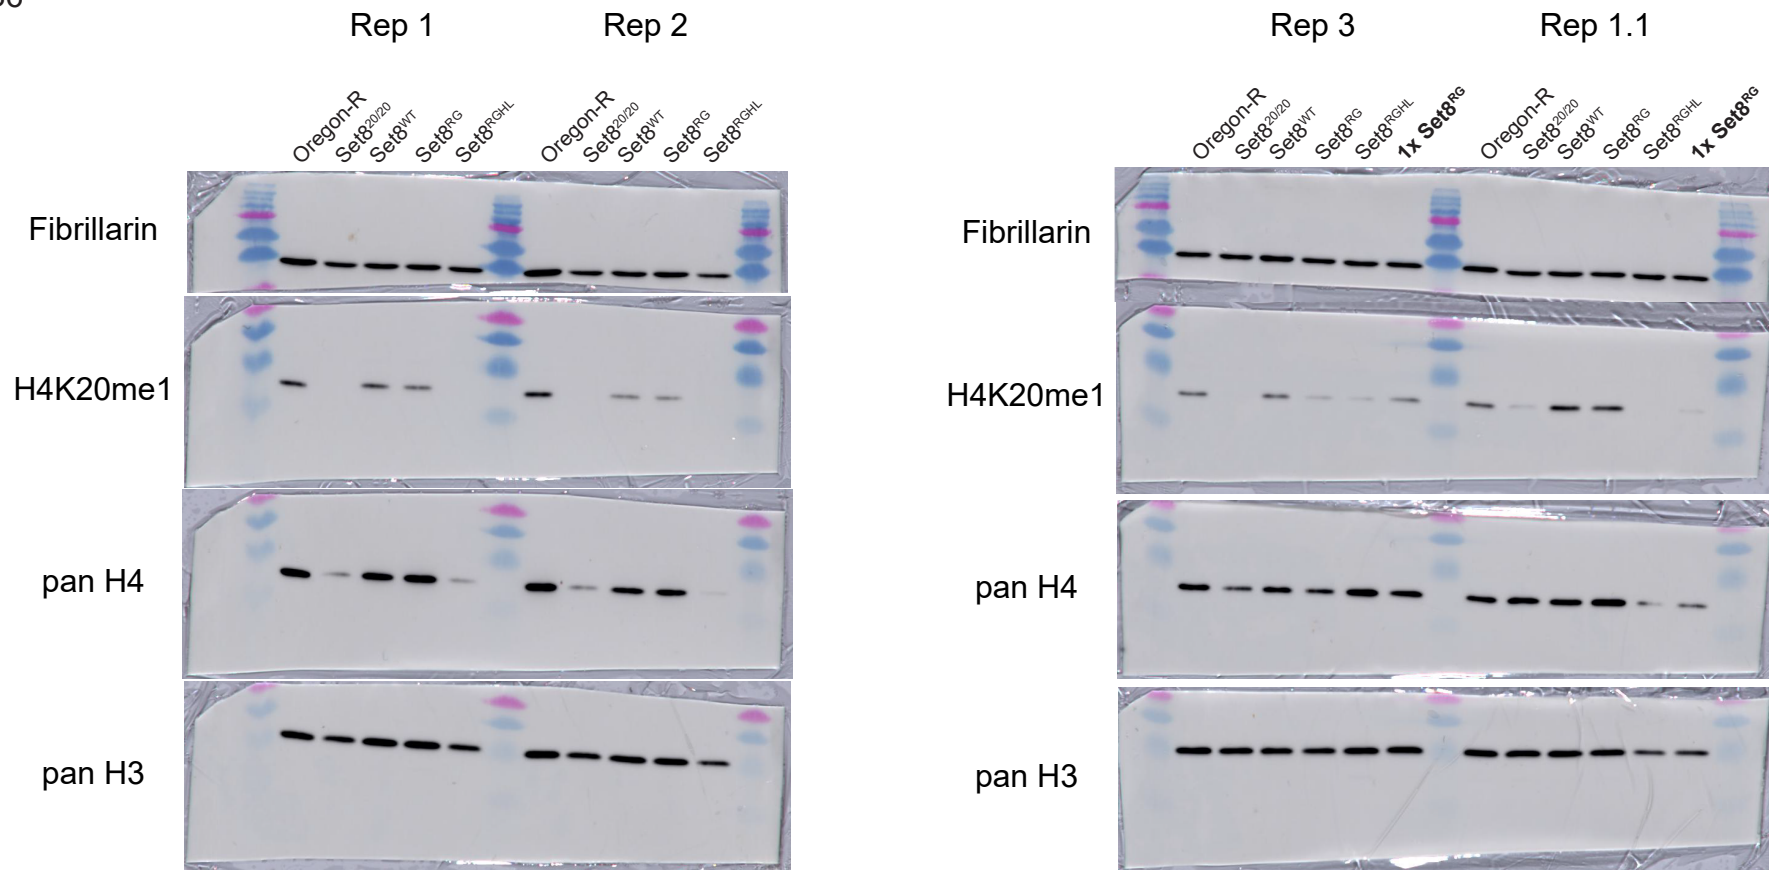

B

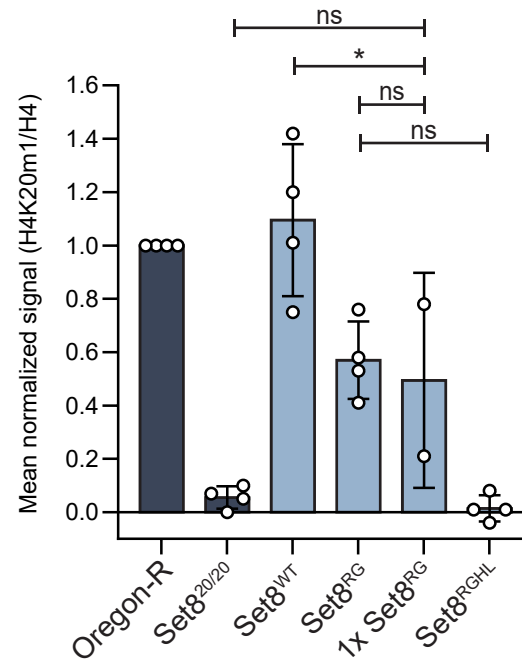

Supplement: Supplementary file 8 [file 1]
